# Supplementary material
Source: PubMed Central journal article supplement (PMC3753729)
Supplement: Supp_Fig3.pdf [file Supp_Fig3.pdf]

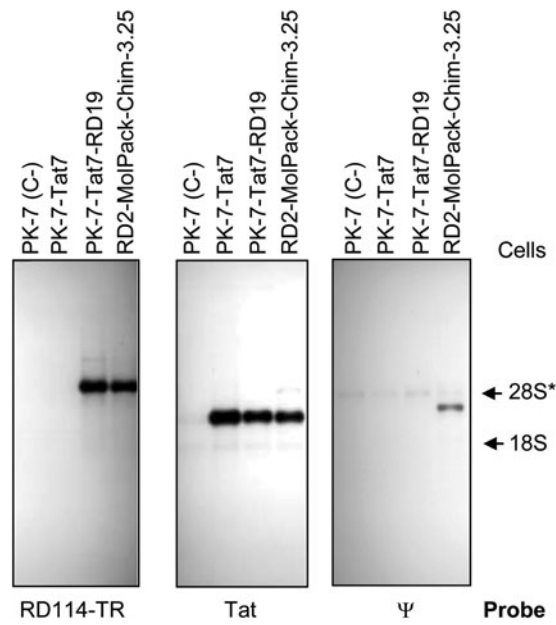

**SUPPLEMENTARY FIG. S3.** Northern blot analysis of the *RD114-TR* and *Tat* expression cassettes. Total RNA (5  $\mu$ g/sample) derived from the different intermediate packaging and producer clones were hybridized with the specific probes as indicated. The size of the *RD114-TR* and *Tat* mRNA transcripts correspond to 4.9 and 2.6 kb, respectively. \*Nonspecific hybridization of the 28S rRNA by the  $\Psi$  probe.
